# Supplementary material for: Genome-wide DNA methylation patterns reveal clinically relevant predictive and prognostic subtypes in human osteosarcoma
Source: PubMed Central journal article supplement (PMC8904843; doi:10.1038/s42003-022-03117-1), 2022-03-08
Supplement: 42003_2022_3117_MOESM2_ESM.pdf [file 42003_2022_3117_MOESM2_ESM.pdf]

## Description of Additional Supplementary Files

**File name:** Supplementary Data 1

**Description:** Characteristics of the TARGET, AECM, JNCCRI, and NY clinical datasets and the GDSC in vitro dataset and sample level group memberships and risk scores from results presented in this report.

**File name:** Supplementary Data 2

**Description:** Methylation profile CpG sites and their statistical associations with clinical outcomes and sample groups.

**File name:** Supplementary Data 3

**Description:** Region based differential methylation analysis between the Global profile cluster groups using minfi bumhunter analysis. Regions were considered significantly differentially methylated if their area had a family wise error rate  $< 0.1$  based on 1,000 permutations.

**File name:** Supplementary Data 4

**Description:** MissMethyl gometh GO and KEGG pathway enrichment in the methylation profiles.

**File name:** Supplementary Data 5

**Description:** Spearman correlation between the methylation profiles and transcription of genes annotated to the profile CpG sites and differential expression of the genes between the methylation profile cluster groups.

**File name:** Supplementary Data 6

**Description:** Geneset enrichment (GSA analysis) using the genes annotated to the methylation profiles. Pathways and terms with a LS permutation p value  $< 0.05$  were considered significant.
